# Supplementary material for: Updated Review of Prevalence of Major Risk Factors and Use of Screening Tests for Cancer in the United States
Source: Oxford University Press journal article supplement (doi:10.1158/1055-9965.epi-17-0219), 2017-05-17
Supplement: 10559965epi170219-sup-180285_2_unknown_upload_4033293_ppswl5.docx [file 10559965epi170219-sup-180285_2_unknown_upload_4033293_ppswl5.docx]

| **Supplemental Table 1. Prevalence (%) of currenta tobacco product use by gender and race/ethnicity,b high school students, National Youth Tobacco Survey, 2015.** | | | | | | | | | | | |
| --- | --- | --- | --- | --- | --- | --- | --- | --- | --- | --- | --- |
|  |  |  |  |  |  |  |  |  |  |  |  |
|  | **Girls** | **Boys** | **White** | **Black** | **Hispanic** |  |  |  |  |  |  |
| **Cigarettes** | 7.7 | 10.7 | 10.2 | 5.7 | 9.0 |  |  |  |  |  |  |
| **Cigarsc** | 5.6 | 11.5 | 8.4 | 12.8 | 7.3 |  |  |  |  |  |  |
| **E-cigarettes** | 12.8 | 19.0 | 17.2 | 8.9 | 16.4 |  |  |  |  |  |  |
| **Smokeless tobaccod** | 1.8 | 10.0 | 7.8 | 1.9 | 4.8 |  |  |  |  |  |  |
| **Water pipe** | 6.9 | 7.4 | 6.9 | 6.4 | 8.7 |  |  |  |  |  |  |
|  |  |  |  |  |  |  |  |  |  |  |  |
| aUse on at least one day within the 30 days preceding the survey. | | | | | |  |  |  |  |  |  |
| bEstimates for white and black are among non-Hispanics. | | | | |  |  |  |  |  |  |  |
| cIncludes cigars, cigarillos, or little cigars. | | |  |  |  |  |  |  |  |  |  |
| dIncludes chewing tobacco/snuff/dip, snus, and/or dissolvable tobacco. | | | | | |  |  |  |  |  |  |
|  |  |  |  |  |  |  |  |  |  |  |  |
| Source: Singh T, Arrazola RA, Corey CG, Husten CG, Neff LJ, Homa DM, King BA. MMWR Morb Mortal Wkly Rep. 2016 Apr 15;65(14):361-7. | | | | | | | | | | | |

| **Supplemental Table 2. Prevalence (%) of physical activity, adults 18 years and older, National Health Interview Survey, 2015** | | | |
| --- | --- | --- | --- |
|  |  |  |  |
|  | **No leisure-time physical activity** | **Met recommended levels of aerobic activitya** | **Met recommended levels of aerobic & muscle-strengthening activityb** |
| **Overall** | **30.3** | **49.8** | **21.6** |
| **Sex** |  |  |  |
| Males | 28.9 | 53.0 | 25.3 |
| Females | 31.6 | 46.9 | 18.0 |
|  |  |  |  |
| **Age (years)** |  |  |  |
| 18-24 | 24.9 | 59.0 | 29.8 |
| 25-44 | 24.6 | 55.5 | 25.2 |
| 45-64 | 32.3 | 46.3 | 18.3 |
| 65+ | 44.3 | 35.6 | 12.2 |
|  |  |  |  |
| **Race/Ethnicityc** |  |  |  |
| White | 26.9 | 53.0 | 23.4 |
| Black | 38.0 | 42.7 | 20.1 |
| Hispanic | 38.8 | 43.3 | 16.8 |
| American Indian / Alaska Native | 33.7 | 41.8 | 19.4 |
| Asian | 25.4 | 52.0 | 19.4 |
|  |  |  |  |
| **Sexual Orientation** |  |  |  |
| Gay/lesbian | 29.7 | 52.8 | 29.9 |
| Straight | 30.3 | 49.8 | 21.6 |
| Bisexual | 30.4 | 47.2 | 22.9 |
|  |  |  |  |
| **Educationd** |  |  |  |
| Some high school or less | 50.7 | 29.8 | 7.9 |
| High school diploma or GED | 40.5 | 38.7 | 13.1 |
| Some college/Assoc. degree | 30.8 | 47.0 | 19.0 |
| College graduate | 17.3 | 63.1 | 30.5 |
|  |  |  |  |
| **Insurance Statuse** |  |  |  |
| Uninsured | 38.7 | 43.6 | 16.8 |
| Insured | 25.8 | 53.9 | 24.3 |
|  |  |  |  |
| **Immigration Status** |  |  |  |
| Born in US | 28.9 | 51.3 | 23.0 |
| Born in US territoryf | 44.5 | 40.0 | 17.7 |
| In US fewer than 10 yrs | 32.8 | 44.9 | 13.7 |
| In US 10+ years | 35.8 | 44.2 | 16.5 |
|  |  |  |  |
| **Region** |  |  |  |
| Northeast | 31.4 | 49.8 | 22.1 |
| Midwest | 29.7 | 48.3 | 21.0 |
| South | 33.4 | 48.1 | 20.7 |
| West | 24.9 | 54.2 | 23.2 |
|  |  |  |  |
|  |  |  |  |
| GED-General Educational Development high school equivalency. | | |  |
| aIncludes 150 minutes of moderate intensity activity or 75 minutes of vigorous intensity activity each week. | | | |
| bIncludes 150 minutes of moderate intensity or 75 minutes of vigorous intensity aerobic activity each week and moderate or high intensity muscle strengthening activity involving all major muscle groups at least two days each week. | | | |
| cEstimates for white, black, American Indian/Alaska Native, and Asian are among non-Hispanics. Estimate for Asians does not include Native Hawaiians or other Pacific Islanders. | | | |
| dAmong persons ages 25 years or older. | |  |  |
| eAmong persons 18-64 years of age. |  |  |  |
| fHave been in the US for any length of time. | |  |  |
| Note: Estimates are age adjusted to 2000 US standard population. | | | |
|  |  |  |  |
| **Source:** Centers for Disease Control and Prevention. National Health Interview Survey, 2015. Public use data file. | | | |

| **Supplemental Table 3. Prevalence of computer usage and physical activity, by gender and race/ethnicity,a high school students, Youth Risk Behavior Survey, 2015.** | | | | | | |
| --- | --- | --- | --- | --- | --- | --- |
|  |  |  |  |  |  |  |
|  | **Met recommended levels of physical activityb** | | | **Used computer ≥3 hrs/day** | | |
|  | **Girls** | **Boys** | **Overall** | **Girls** | **Boys** | **Overall** |
| **Overall** | **17.7** | **36.0** | **27.1** | **42.8** | **40.6** | **41.7** |
| **White** | 19.5 | 38.5 | **29.0** | 38.3 | 38.9 | **38.6** |
| **Black** | 16.6 | 30.8 | **24.2** | 48.4 | 41.2 | **44.6** |
| **Hispanic** | 14.7 | 34.2 | **24.6** | 47.4 | 45.1 | **46.2** |
| **Asian** | 8.5 | 23.0 | **16.5** | 50.3 | 41.8 | **45.6** |
| **American Indian / Alaska Native** | c | c | **39.2** | c | c | **35.9** |
| **Multiple Races** | 19.9 | 42.5 | **30.4** | 49.8 | 42.7 | **46.9** |
|  |  |  |  |  |  |  |
| aEstimates for white, black, and Asian are among non-Hispanics. | | | | | |  |
| bPhysical activity that increased heart rate and made breathing difficult some of the time for a total of at least 60 minutes/day on all 7 days preceding the survey. | | | | | | |
| cSample size <100. | |  |  |  |  |  |
| Note: Data not presented for non-Hispanic Native Hawaiians or Other Pacific Islanders due to small sample size. | | | | | | |
|  |  |  |  |  |  |  |
| Source: Centers for Disease Control and Prevention (CDC). 2015 High School Youth Risk Behavior Survey Data. Available at http://nccd.cdc.gov/youthonline/. Accessed on December 20, 2016. Kann L, McManus T, Harris WA, et al., Youth Risk Behavior Surveillance - United States, 2015. MMWR Surveill Summ 2016;65(SS06): 1-180. | | | | | | |

| **Supplemental Table 4. Vaccination coverage (%), adolescents ages 13 to 17 years by state, National Immunization Survey, 2015** | | | | | | | |
| --- | --- | --- | --- | --- | --- | --- | --- |
|  |  |  |  |  |  |  |  |
|  |  |  |  |  |  |  |  |
|  | **Human Papillomavirus** | | | | | | **Hepatitis B** |
|  | **Girls** | | | **Boys** | | | **Overall** |
|  | **≥ 1 dose** | **≥ 2 doses** | **≥ 3 doses** | **≥ 1 dose** | **≥ 2 doses** | **≥ 3 doses** | **≥ 3 doses** |
| **United States** | **62.8** | **52.2** | **41.9** | **49.8** | **39.0** | **28.1** | **91.1** |
| *Range* | *47.7-87.9* | *35.9-77.9* | *24.4-68.0* | *34.8-80.6* | *25.2-66.6* | *16.0-58.1* | *83.1-97.8* |
| Alabama | 57.7 | 50.4 | 40.8 | 39.4 | 30.3 | 22.6 | 94.1 |
| Alaska | 57.0 | 46.3 | 36.9 | 41.6 | 30.3 | 18.8 | 90.1 |
| Arizona | 68.3 | 56.1 | 44.2 | 51.3 | 40.6 | 27.0 | 83.5 |
| Arkansas | 63.5 | 49.4 | 34.0 | 44.2 | 28.9 | 16.4 | 91.2 |
| California | 66.7 | 59.7 | 48.4 | 58.5 | 41.8 | 29.5 | 84.9 |
| Colorado | 65.3 | 57.7 | 46.0 | 63.2 | 52.7 | 37.1 | 93.2 |
| Connecticut | 70.9 | 64.3 | 55.2 | 65.3 | 58.2 | 42.0 | 97.3 |
| Delaware | 67.6 | 60.9 | 52.8 | 62.9 | 53.2 | 43.0 | 94.4 |
| District of Columbia | 76.5 | 67.5 | 58.8 | 73.0 | 57.6 | 40.9 | 89.3 |
| Florida | 62.5 | 44.6 | 36.8 | 45.3 | 33.2 | 19.8 | 95.4 |
| Georgia | 54.4 | 38.7 | 32.3 | 51.0 | 42.5 | 27.5 | 97.2 |
| Hawaii | 71.3 | 64.1 | 52.4 | 62.5 | 50.2 | 36.2 | 93.0 |
| Idaho | 57.3 | 43.5 | 30.3 | 44.2 | 36.4 | 26.4 | 83.1 |
| Illinois | 62.0 | 52.0 | 40.2 | 44.3 | 34.3 | 26.8 | 93.1 |
| Indiana | 53.7 | 43.1 | 30.9 | 43.2 | 34.3 | 27.5 | 91.4 |
| Iowa | 66.7 | 62.3 | 49.8 | 48.0 | 37.0 | 23.9 | 93.4 |
| Kansas | 50.9 | 43.6 | 31.7 | 36.0 | 26.3 | 18.5 | 86.8 |
| Kentucky | 57.4 | 42.7 | 36.2 | 34.8 | 25.2 | 17.1 | 92.8 |
| Louisiana | 60.3 | 53.3 | 39.3 | 49.5 | 39.1 | 30.5 | 95.5 |
| Maine | 66.0 | 53.9 | 44.1 | 65.8 | 58.7 | 46.7 | 94.6 |
| Maryland | 66.0 | 61.7 | 43.7 | 55.0 | 46.6 | 31.3 | 90.6 |
| Massachusetts | 73.5 | 63.0 | 52.8 | 63.0 | 50.9 | 35.2 | 95.4 |
| Michigan | 67.6 | 56.9 | 47.2 | 52.3 | 40.2 | 28.6 | 94.8 |
| Minnesota | 65.5 | 51.3 | 44.5 | 57.1 | 36.2 | 22.4 | 93.2 |
| Mississippi | 52.4 | 37.2 | 24.4 | 38.9 | 29.6 | 21.4 | 92.1 |
| Missouri | 59.3 | 43.4 | 31.5 | 44.7 | 33.7 | 25.1 | 89.5 |
| Montana | 55.0 | 41.8 | 34.8 | 46.0 | 33.3 | 21.7 | 88.2 |
| Nebraska | 67.3 | 55.5 | 48.2 | 54.3 | 46.9 | 32.2 | 92.5 |
| Nevada | 72.0 | 57.6 | 42.5 | 44.5 | 31.9 | 23.7 | 92.1 |
| New Hampshire | 74.2 | 59.7 | 51.4 | 69.8 | 55.1 | 47.1 | 97.8 |
| New Jersey | 69.0 | 56.3 | 45.0 | 50.9 | 41.4 | 30.9 | 96.0 |
| New Mexico | 66.7 | 55.6 | 40.6 | 54.3 | 49.9 | 40.3 | 88.3 |
| New York | 62.3 | 56.4 | 47.3 | 60.3 | 49.4 | 38.1 | 95.8 |
| North Carolina | 65.7 | 53.5 | 37.8 | 48.0 | 40.3 | 29.8 | 93.3 |
| North Dakota | 70.5 | 60.9 | 47.1 | 62.3 | 53.1 | 38.4 | 91.7 |
| Ohio | 61.0 | 47.8 | 37.8 | 43.7 | 32.0 | 21.0 | 92.0 |
| Oklahoma | 58.1 | 43.4 | 32.2 | 52.9 | 40.1 | 35.7 | 95.3 |
| Oregon | 70.0 | 55.4 | 48.9 | 58.6 | 48.2 | 35.7 | 91.6 |
| Pennsylvania | 62.2 | 56.4 | 47.8 | 55.9 | 48.2 | 38.3 | 93.3 |
| Rhode Island | 87.9 | 77.9 | 68.0 | 80.6 | 66.6 | 58.1 | 95.1 |
| South Carolina | 53.7 | 43.3 | 34.3 | 35.1 | 26.4 | 21.0 | 91.8 |
| South Dakota | 53.2 | 42.3 | 32.4 | 39.2 | 28.6 | 22.0 | 90.1 |
| Tennessee | 59.7 | 46.7 | 38.9 | 38.2 | 26.0 | 16.0 | 94.1 |
| Texas | 60.1 | 50.4 | 40.9 | 41.4 | 32.9 | 24.0 | 85.3 |
| Utah | 47.8 | 35.9 | 24.6 | 40.9 | 33.7 | 19.9 | 86.2 |
| Vermont | 68.7 | 59.1 | 54.4 | 66.1 | 56.9 | 41.1 | 96.1 |
| Virginia | 61.2 | 43.9 | 38.5 | 40.1 | 32.0 | 25.7 | 89.2 |
| Washington | 65.8 | 55.8 | 45.1 | 46.8 | 41.2 | 28.0 | 85.0 |
| West Virginia | 62.0 | 49.7 | 39.2 | 45.3 | 36.6 | 27.1 | 86.5 |
| Wisconsin | 60.5 | 53.2 | 47.3 | 46.4 | 42.1 | 33.5 | 93.2 |
| Wyoming | 47.7 | 37.6 | 26.5 | 37.1 | 30.8 | 18.8 | 92.8 |
|  |  |  |  |  |  |  |  |
|  |  |  |  |  |  |  |  |
|  |  |  |  |  |  |  |  |
|  |  |  |  |  |  |  |  |
| **Source:** Reagan-Steiner S, Yankey D, Jeyarajah J, et al. MMWR Morb Mortal Wkly Rep. 2016; 65(33):850-858. Complete data tables available at: <http://www.cdc.gov/vaccines/imz-managers/coverage/teenvaxview/data-reports/index.html> Accessed: September 23, 2016. | | | | | | | |
